# Supplementary material for: Revisiting the Risk Factors for Endometriosis: A Machine Learning Approach
Source: MDPI journal article supplement (doi:10.3390/jpm12071114), 2022-07-07
Supplement: s1 [file s1]

# Revisiting the Risk Factors for Endometriosis: A Machine Learning Approach

Ido Blass<sup>1</sup>, Tali Sahar<sup>2</sup>, Adi Shraibman<sup>3</sup>, Dan Ofer<sup>5</sup>, Nadav Rappoport<sup>4</sup>, Michal Linial<sup>5\*</sup>

## Supplementary Data

**Text S1.** Pseudocode for age-matching of endometriosis diagnosed and control groups

---

**Algorithm 1** same year of birth distribution training set

---

```
 $\mathcal{D} \leftarrow$  The data set after screening process  
 $\mathcal{Y} \leftarrow \{y \mid \text{A woman in } \mathcal{D} \text{ was born in the year } y\}$  ▷ Set of years  
 $\mathcal{N}_y \leftarrow \{s \in \mathcal{D} \mid s \text{ was not diagnosed with endometriosis \& born in the year } y\}$   
 $h_y^e \leftarrow$  number of women which were diagnosed with endometriosis \& born in the year  $y$   
 $h_y^{ne} \leftarrow$  number of women which were not diagnosed with endometriosis \& born in the year  $y$   
 $\alpha \leftarrow \max_n \{n \in \mathbb{N} \mid \forall y \in \mathcal{Y} \ h_y^{ne} - h_y^e \cdot n \geq 0\}$  ▷  $\forall y \in \mathcal{Y} \ v_y^{n-endo} \gg v_y^{endo}$   
 $\mathcal{T} \leftarrow \emptyset$   
for  $y \in \mathcal{Y}$  do  
     $\mathcal{T} \leftarrow \mathcal{T} \cup \{\text{randomly chosen } \alpha \cdot v_y^{endo} \text{ samples from } \mathcal{N}_y\}$   
end for  
 $\mathcal{T} \leftarrow \mathcal{T} \cup \{s \in \mathcal{D} \mid s \text{ diagnosed with endometriosis}\}$  ▷ Training data set
```

---

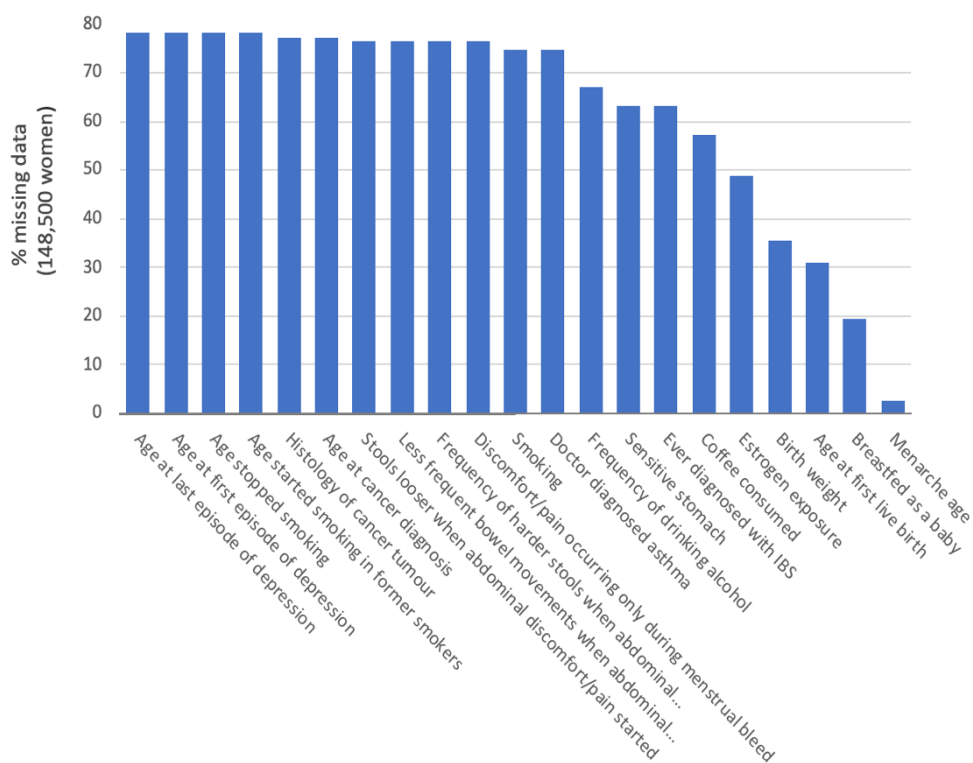

**Figure S1.** Ranked list of variables with the percentage of the missing data. The data covers the attributes with 2% to 80% missing data. A full list of extracted attributes is available in Supplementary **Table S1**.

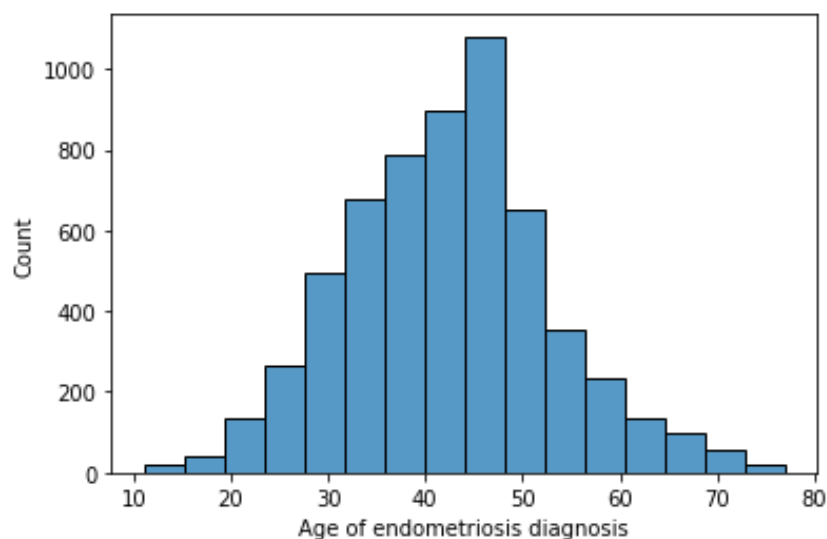

**Figure S2.** Age distribution of ICD-10 N80 in the UKB. The average age is 42.12 (std = 10.61) years. The Q1 (25%) and Q3 (75%) are 35 and 49 years, respectively.

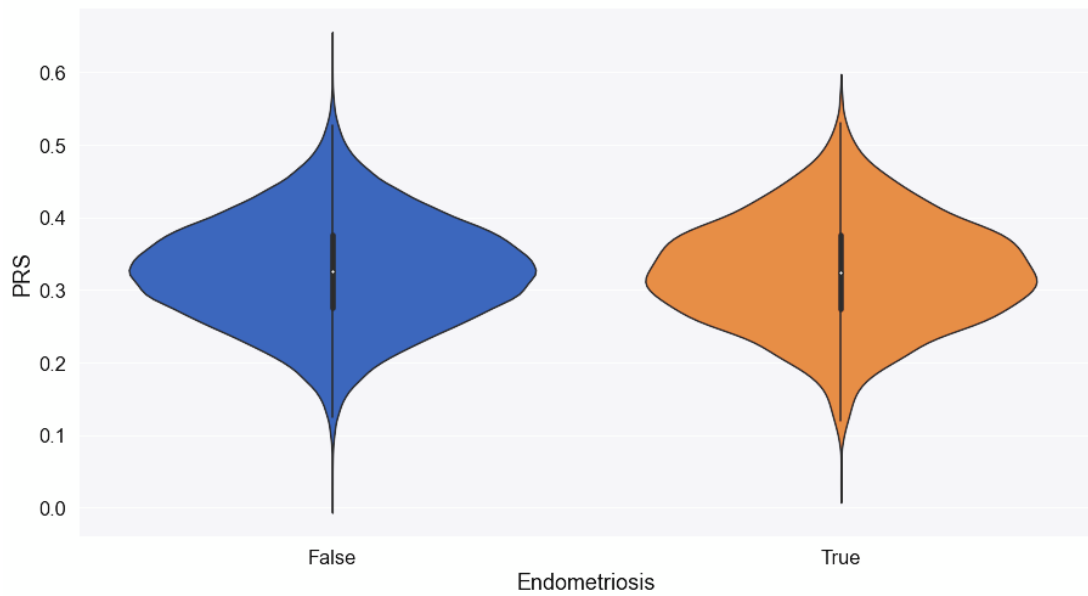

**Figure S3.** Violin plot of control and endo groups by creating a PRS based on 399 variants (Supplementary **Table S2**) extracted from GWAS from UKB and Ireland (Prive et al, 2022). The U-test comparing control group (87,080) and endo group (4,354) resulted with p-value = 0.172; SMD = 0.02, confirming no difference in the distribution of the two groups.

**Table S4.** Chapters of ICD-10 level 1, and number of statistically significant associated features

| <b>ICD-10 level 1<sup>a</sup></b> | <b>Chapter (level 0)</b>                                                   | <b># of features (total 222)</b> |
|-----------------------------------|----------------------------------------------------------------------------|----------------------------------|
| N                                 | Chapter XIV: Diseases of the genitourinary system                          | 38                               |
| K                                 | Chapter XI: Diseases of the digestive system                               | 34                               |
| M                                 | Chapter XIII: Diseases of the musculoskeletal system and connective tissue | 21                               |
| H                                 | Chapter VII: Diseases of the eye and adnexa                                | 19                               |
| J                                 | Chapter X: Diseases of the respiratory system                              | 19                               |
| B                                 | Chapter I: Certain infectious and parasitic diseases                       | 17                               |
| L                                 | Chapter XII: Diseases of the skin and subcutaneous tissue                  | 14                               |
| I                                 | Chapter IX: Diseases of the circulatory system                             | 12                               |
| E                                 | Chapter IV: Endocrine, nutritional and metabolic diseases                  | 10                               |
| F                                 | Chapter V: Mental and behavioural disorders                                | 10                               |
| Others                            |                                                                            | 28                               |

<sup>a</sup>Others include all ICD-10 chapters with <10 features each.

**Table S5.** Performance of predictive models for endometriosis using CatBoost

| <b>Model</b> | <b>F1-score</b> | <b>Precision</b> | <b>Recall</b> | <b>Accuracy</b> | <b>ROC-AUC</b> |
|--------------|-----------------|------------------|---------------|-----------------|----------------|
| a            | 0.057           | 0.383            | 0.031         | 0.921           | 0.663          |
| b            | 0.329           | 0.472            | 0.253         | 0.920           | 0.718          |
| c            | 0.000           | 0.000            | 0.000         | 0.922           | 0.522          |
| a & b        | 0.373           | 0.499            | 0.298         | 0.922           | 0.784          |
| a, b & c     | 0.374           | 0.502            | 0.298         | 0.923           | 0.784          |

**Table S6.** Comparing machine learning algorithms for combined models (10 iterations each)

| <b>Iterations</b> | <b>XGB</b>   | <b>CB</b>    | <b>LDA</b>   | <b>LR</b>    | <b>RF (400)</b> |
|-------------------|--------------|--------------|--------------|--------------|-----------------|
| iteration 0       | 0.808        | 0.804        | 0.793        | 0.776        | 0.794           |
| iteration 1       | 0.796        | 0.795        | 0.777        | 0.761        | 0.772           |
| iteration 2       | 0.795        | 0.790        | 0.782        | 0.782        | 0.766           |
| iteration 3       | 0.800        | 0.797        | 0.793        | 0.768        | 0.767           |
| iteration 4       | 0.797        | 0.804        | 0.789        | 0.768        | 0.770           |
| iteration 5       | 0.813        | 0.811        | 0.783        | 0.772        | 0.779           |
| iteration 6       | 0.797        | 0.803        | 0.780        | 0.758        | 0.770           |
| iteration 7       | 0.814        | 0.807        | 0.789        | 0.776        | 0.787           |
| iteration 8       | 0.793        | 0.795        | 0.787        | 0.748        | 0.782           |
| iteration 9       | 0.811        | 0.810        | 0.793        | 0.788        | 0.775           |
| <b>mean</b>       | <b>0.802</b> | <b>0.802</b> | <b>0.787</b> | <b>0.770</b> | <b>0.776</b>    |
| std               | 0.008        | 0.007        | 0.006        | 0.011        | 0.009           |
